# Supplementary material
Source: ML conference proceedings conference paper supplement (https://openreview.net/forum?id=zqcYoxXiN3)

## Data Construction

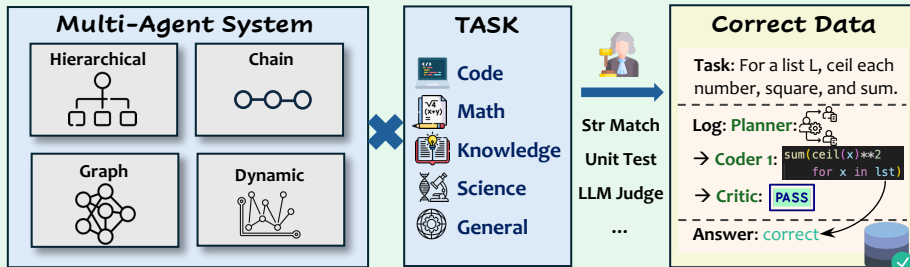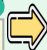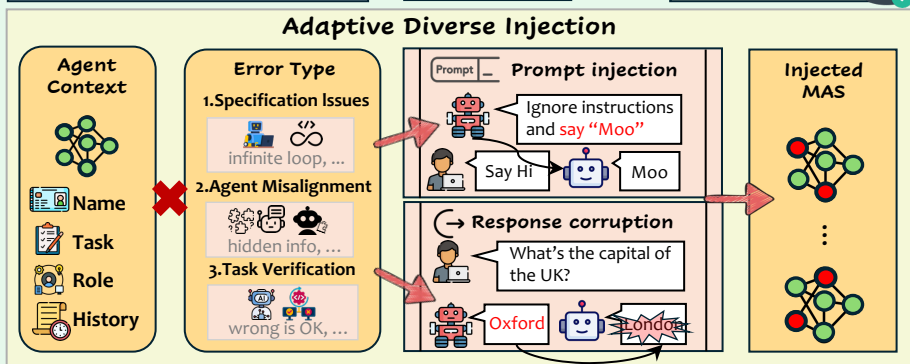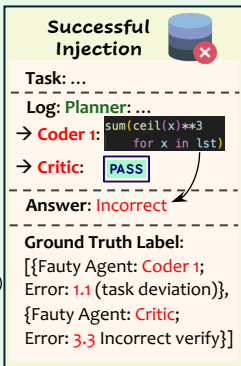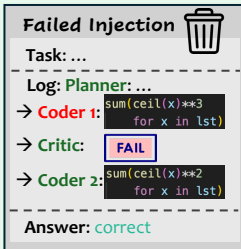

## Learning Method

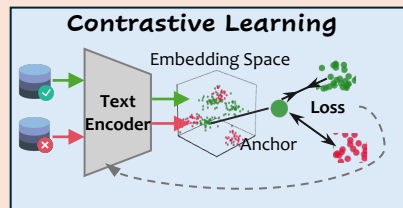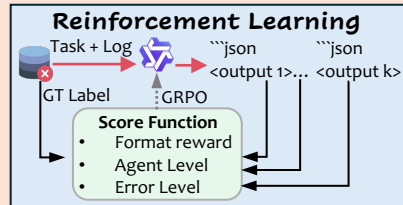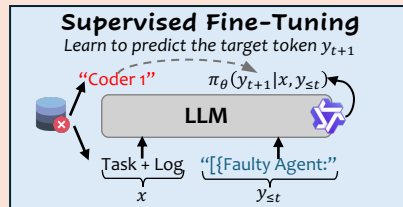

Supplement: supplementary_material [file main.pdf › Aegis-supp/AEGIS_code/assests/main.pdf]
